# Supplementary material for: The effect of a metallic Ni core on charge dynamics in CdS-sensitized p-type NiO nanowire mesh photocathodes
Source: Royal Society of Chemistry journal article supplement (doi:10.1039/c3ra41216d), 2013-01-01
Supplement: c3ra41216d.pdf [file c3ra41216d.pdf]

## Supporting Information

### The effect of a metallic Ni core on charge dynamics in CdS sensitized-p-type NiO nanowire mesh photocathodes

Soon Hyung Kang,<sup>a,b</sup> Nathan R. Neale,<sup>a</sup> Kai Zhu,<sup>\*a</sup> Adam F. Halverson,<sup>a,c</sup> Yanfa Yan,<sup>a,d</sup> and Arthur J. Frank<sup>\*a</sup>

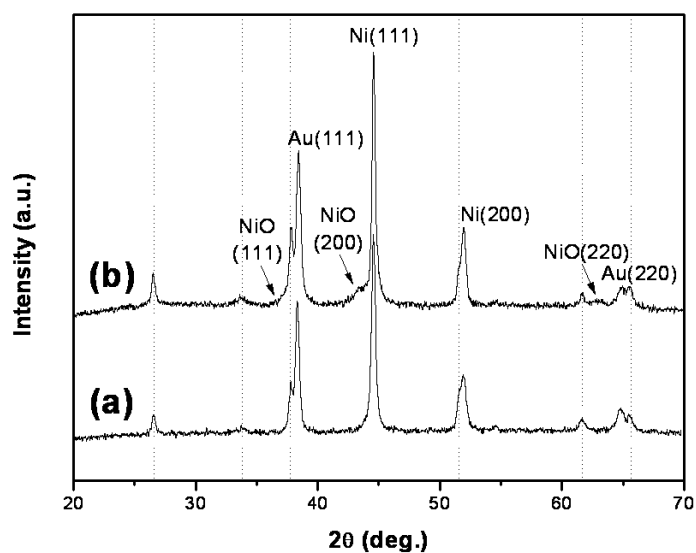

**Figure S1.** XRD spectrum of (a) Ni and (b) Ni core-NiO shell inverse opal nanowire mesh electrode. The vertical dot line indicates the peaks from the FTO substrate.

<sup>a</sup> National Renewable Energy Laboratory, 1617 Cole Blvd., Golden, CO 80401, USA. E-mail: Kai.Zhu@nrel.gov (K. Zhu), Arthur.Frank@nrel.gov (A. J. Frank); Fax:+1 303 384 6150; Tel: +1 303 384 6353, 6262

<sup>b</sup> Department of Chemistry Education, Chonnam National University, Gwangju 500-757, South Korea.

<sup>c</sup> GE Global Research, 1 Research Circle, Niskayuna, New York, 12309, USA.

<sup>d</sup> Department of Physics and Astronomy, The University of Toledo, Toledo, OH 43606, USA.

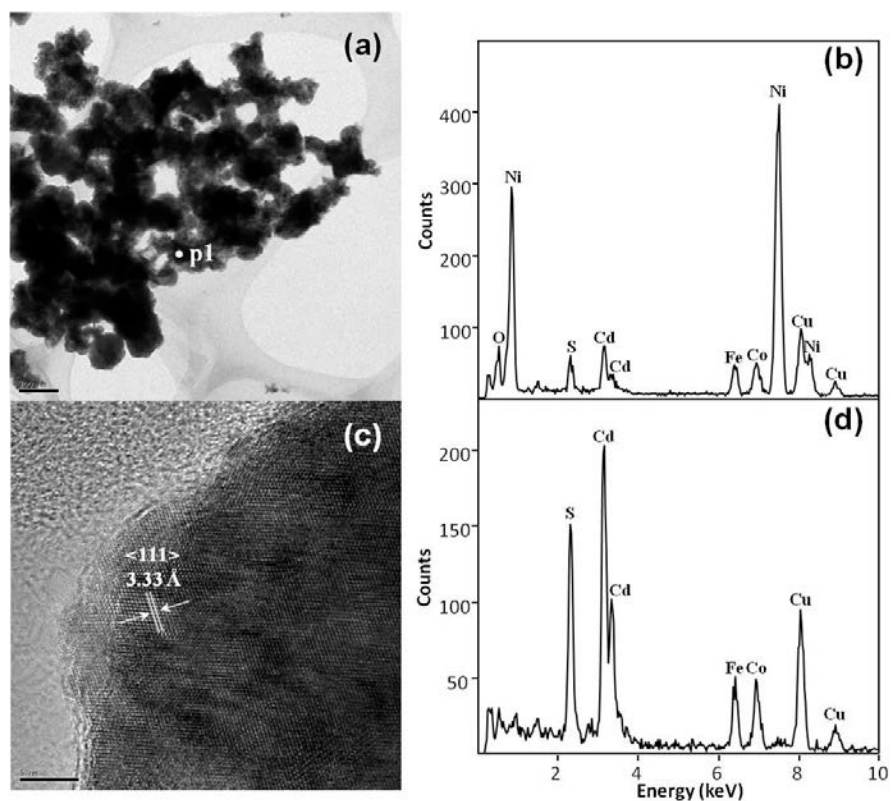

**Figure S2.** TEM image of (a) Ni-NiO core-shell nanowire mesh coated with CdS layer, (b) EDS result of point 1 in the average large area, (c) high-resolution TEM image of (a) region focusing on the outer part, and (d) EDS result of (c) region.

Figure S2 shows the TEM images of CdS-sensitized Ni-NiO core-shell nanowire mesh electrode. The spot like CdS sensitizer was uniformly deposited through the whole surface region. The EDS analysis of point 1 (Fig. S2b) shows that the surface region contains the chemical elements of Cd and S as well as Ni and O. The latter two elements exhibit more intense diffraction peaks from middle of the Ni-NiO core-shell structure where the CdS would be thinnest and shield diffraction from Ni and O would be the least.

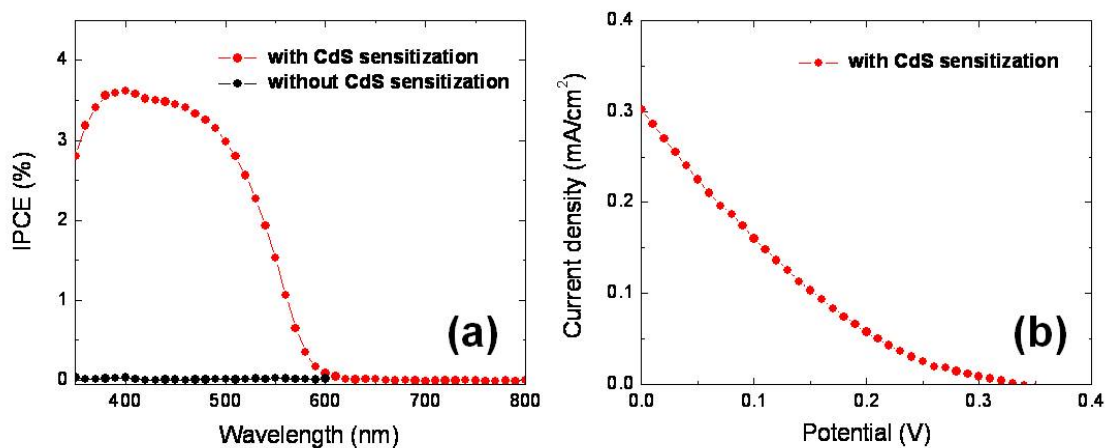

**Figure S3.** IPCE spectra (a) and  $J$ - $V$  curve (b) of CdS-sensitized Ni-NiO core-shell inverse opal nanowire mesh film in polysulfide electrolyte. Also shown in (a) is the core-shell structure without CdS.

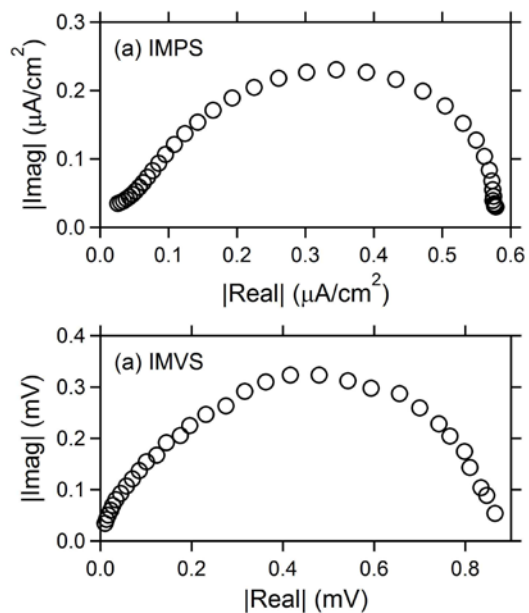

**Figure S4.** Typical (a) IMPS and (b) IMVS responses in the complex plane for the CdS-sensitized Ni-NiO core-shell inverse opal nanowire mesh photocathode.
